# Supplementary material for: LncRNA DANCR promotes macrophage lipid accumulation through modulation of membrane cholesterol transporters
Source: publisher site journal article supplement (doi:10.18632/aging.205992), 2024-07-02
Supplement: Supplementary file [file aging-v16-205992-supplementary-material-SD1.pdf]

## SUPPLEMENTARY TABLE

**Supplementary Table 1. The primer sequences used in this study.**

| Gene              | Sequences                                                                            |
|-------------------|--------------------------------------------------------------------------------------|
| DANCR (Human)     | Forward, 5'-ACTCACTCACTCACTCACT-3';<br>Reverse, 5'-GCCTCTGTATACTATTCTTGCCA-3'        |
| DANCR (Mouse)     | Forward, 5'-CGCGAGACACAAAGTCCTCT -3';<br>Reverse, 5'-CTGGAACCTCCGTCTTCTCG -3'        |
| miR-33a (Human)   | Forward, 5'-CCTCATAAGCGGTGCATTGTA-3';<br>Reverse, 5'-TATGCTTGTTCGTCTCTGTGTC-3'       |
| ABCA1 (Human)     | Forward, 5'-GCTCAGTGGGATGGATGGCAAAG-3';<br>Reverse, 5'-CTCCGTCTGGCAATTAGCAGTCTC-3'   |
| ABCG1 (Human)     | Forward, 5'-TCTCGGTGGATGAGGTGGTGTGTC-3';<br>Reverse, 5'-GCTGGGCTTCCGTGAGGTTATTATC-3' |
| SR-BI (Human)     | Forward, 5'-AGCAAGGTTGACTTCTGGCATTCC-3';<br>Reverse, 5'-TGTAGAACTCCAGCGAGGACTCAG-3'  |
| SR-A (Human)      | Forward, 5'-GACACTGATAGCTGCTCCGAATCTG-3';<br>Reverse, 5'-AAACACGAGGAGGTAAGGGCAATC-3' |
| CD-36 (Human)     | Forward, 5'-GGAAGTGATGATGAACAGCAGCAAC-3';<br>Reverse, 5'-TGTCCTCAGCGTCCTGGGTTAC-3'   |
| si-DANCR (Human)  | Forward, 5'-CUGCAUCCUGAACCGUUATT-3';<br>Reverse, 5'-UACGGUUCAGGAAUGCAGTT-3'          |
| miR-33a mimics    | Forward, 5'-GUGCAUUGUAGUUGCAUUGCA-3';<br>Reverse, 5'-CAAUGCAACUACAAUGCACUU-3'        |
| miR-33a inhibitor | Forward, 5'-UGCAAUGCAACUACAAUGCAC-3';<br>Reverse, 5'-GGAGCGAGATCCCTCCAAAAT-3';       |
| GAPDH (Human)     | Reverse, 5'-GGCTGTTGTCATACTTCTCATGG-3'                                               |
| U6 (Human)        | Forward, 5'-GCTTCGGCAGCACATATACTAAAAT-3';<br>Reverse, 5'-CGCTTCACGAATTTGCGTGTGCAT-3' |
| U6 (Mouse)        | Forward, 5'-CTCGCTTCGGCAGCACATATACT-3';<br>Reverse, 5'-ACGCTTCACGAATTTGCGTGTGC-3'    |
